# Supplementary material
Source: PubMed Central journal article supplement (PMC9247911)
Supplement: 11655_2022_3578_MOESM2_ESM.pdf [file 11655_2022_3578_MOESM2_ESM.pdf]

## Appendix 2. Characteristic of the 9 Trials Included in the Meta-Analysis

| Author(s)          | Sample size<br>(experimental/<br>control) | Patient<br>enrollment<br>time | Experimental                 | Control           | Duration | Outcome measures                                                                                                                                                                                       |
|--------------------|-------------------------------------------|-------------------------------|------------------------------|-------------------|----------|--------------------------------------------------------------------------------------------------------------------------------------------------------------------------------------------------------|
| Chen et al., 2020  | 35/35                                     | 2020.2.28-2020.3.31           | LHQW capsule (1.4 g Bid)     | Arbidol           | 15 days  | CT                                                                                                                                                                                                     |
| Cheng et al., 2020 | 51/51                                     | 2020.1.1-2020.1.31            | LHQW granule (6 g Tid) + C   | Chemical<br>drugs | 7 days   | CT, fever, cough, fatigue, expectoration,<br>shortness of breath, dyspnea, chest<br>distress, inappetence, nausea, muscular<br>soreness, exacerbation rate                                             |
| Fang et al., 2020  | 42/41                                     | 2020.1.28-2020.3.31           | LHQW granule (6 g Tid) + C   | Chemical<br>drugs | 5-7 days | Fever, fatigue, expectoration, shortness of<br>breath, rhinobyon, rhinorrhea, muscular<br>soreness                                                                                                     |
| Hu et al., 2020    | 142/142                                   | 2020.2.2-2020.2.15            | LHQW capsule (1.4 g Tid) + C | Chemical<br>drugs | 14 days  | CT                                                                                                                                                                                                     |
| Lv et al., 2020    | 63/38                                     | 2020.1.1-2020.2.28            | LHQW granule (6 g Tid) + C   | Chemical<br>drugs | 10 days  | Expectoration, shortness of breath,<br>dyspnea, chest distress, rhinobyon,<br>rhinorrhea, sore throat, inappetence,<br>nausea, emesis, diarrhea, muscular<br>soreness, headache, exacerbation rate     |
| Xu et al., 2020    | 26/26                                     | 2020.1.29-2020.2.28           | LHQW capsule (1.4 g Tid) + C | Chemical<br>drugs | 7 days   | CT                                                                                                                                                                                                     |
| Yao et al., 2020   | 21/21                                     | 2020.1.11-2020.1.30           | LHQW granule (6 g Tid) + C   | Chemical<br>drugs | NR       | Fever, cough, fatigue, expectoration,<br>shortness of breath, dyspnea, chest<br>distress, rhinobyon, rhinorrhea, sore throat,<br>inappetence, nausea, emesis, diarrhea,<br>muscular soreness, headache |

---

|                                   |                    |                            |                   |               |                       |
|-----------------------------------|--------------------|----------------------------|-------------------|---------------|-----------------------|
| Yu and Li et al., 147/148<br>2020 | 2020.2.17-2020.3.6 | LHQW granule (6 g Tid) + C | Chemical<br>drugs | 7 days        | CT, exacerbation rate |
| Yu and Ren et al., 85/38<br>2020  | 2020.2.17-2020.3.6 | LHQW capsule (1.4 g Tid)   | Arbidol           | Indeterminacy | Exacerbation rate     |

---

Notes: C: control group; NR: not reported.



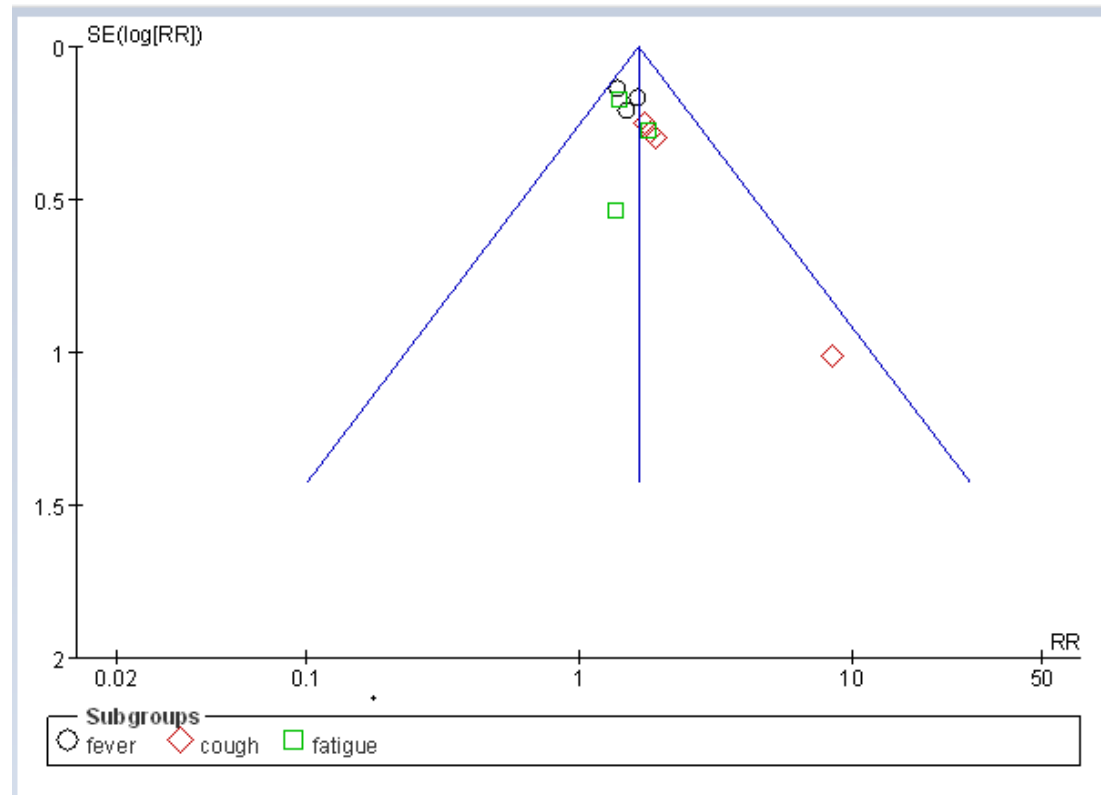

**Appendix 4. Inverted Funnel Plot of LHQW in Treatment of COVID-19 for Disappearance Rate of Primary Symptoms**

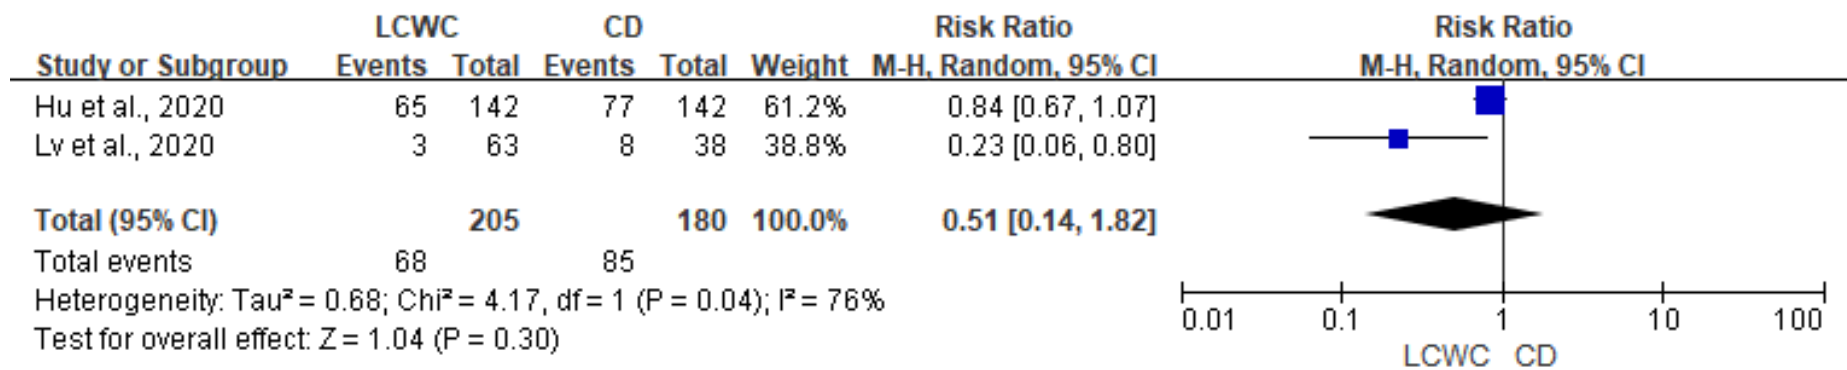

**Appendix 5. Forest Plot of the Trials Showing Adverse Reaction in LCWC vs. CD**
