# Supplementary material
Source: PubMed Central journal article supplement (PMC9247911)

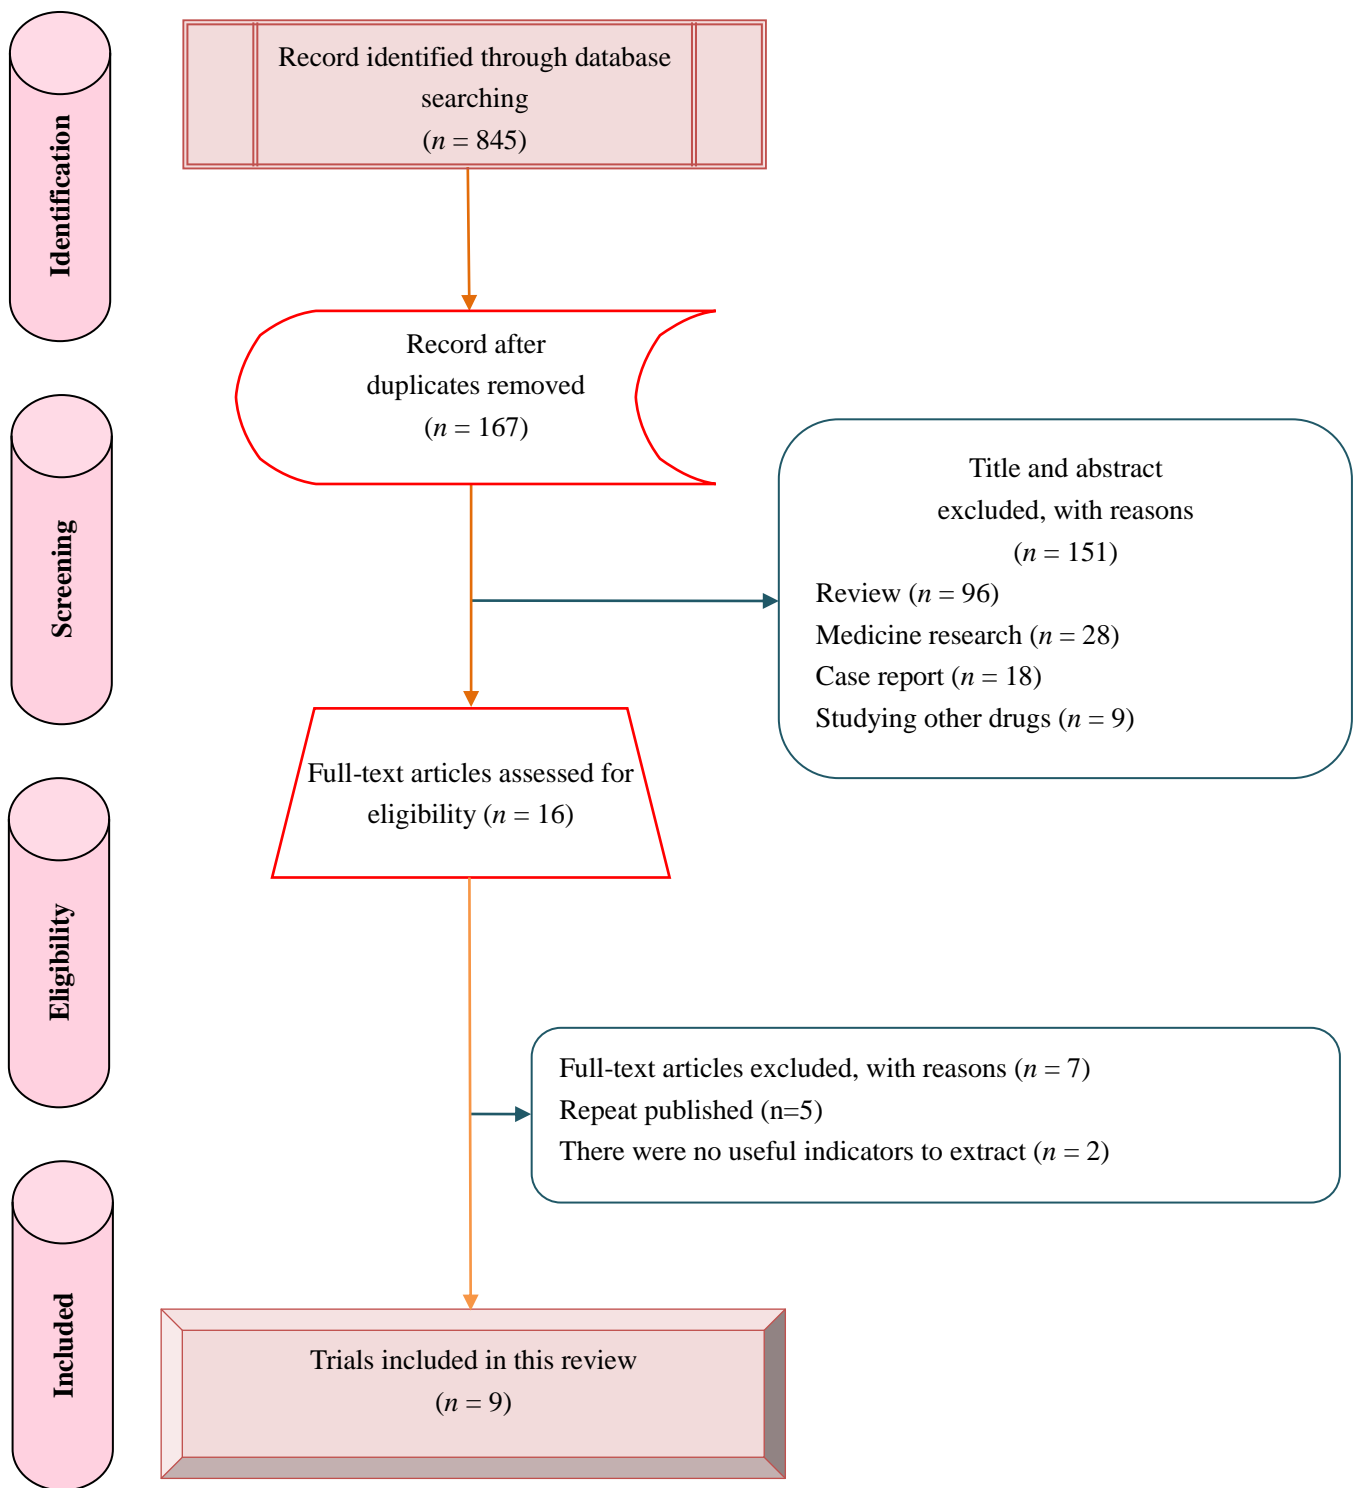

**Appendix 1. PRISMA Flow Diagram of Literature Selection**

Supplement: 11655_2022_3578_MOESM1_ESM.pdf [file 11655_2022_3578_MOESM1_ESM.pdf]
